# Supplementary material for: A Voltage-Based STDP Rule Combined with Fast BCM-Like Metaplasticity Accounts for LTP and Concurrent “Heterosynaptic” LTD in the Dentate Gyrus In Vivo
Source: PLOS journal article supplement (doi:10.1371/journal.pcbi.1004588), 2015-11-06
Supplement: S3 (10.1371/journal.pcbi.1004588.s003) [file journal.pcbi.1004588.s003.PDF]

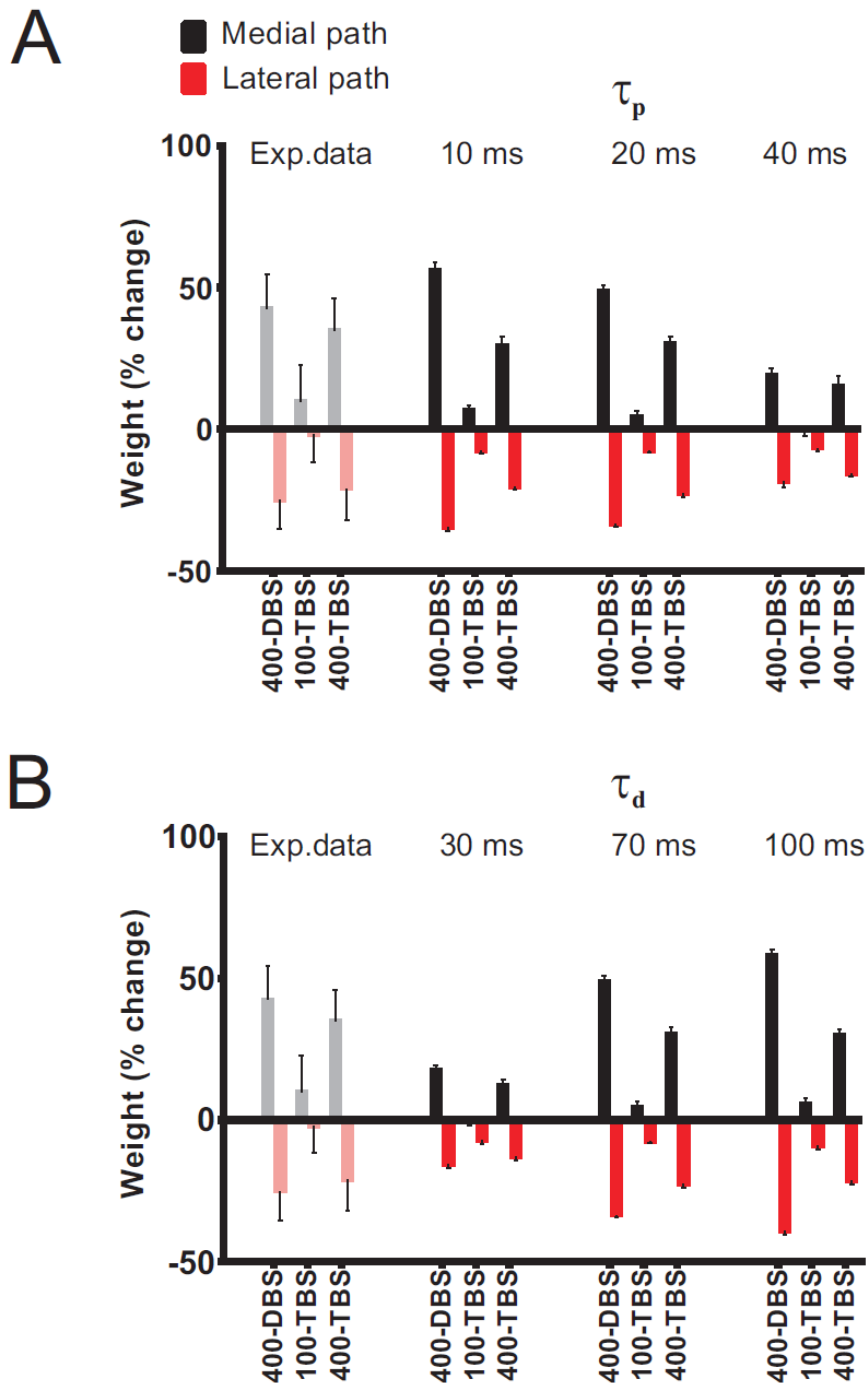

**Figure S3. Effect on the magnitude of LTP and concurrent heterosynaptic LTD when varying the decay constants in the STDP rule in the compartmental granule cell model. (A) Results for values of  $t_d = 30$  ms, 70 ms and 100 ms when  $t_p = 20$  ms. (B) Results for values of  $t_p = 10$  ms, 20 ms and 40 ms when  $t_d = 70$  ms. Other values: 60% tetanized MPP synapses, noise 0.05,  $A_p(0) = 0.003$ ,  $A_d(0) = 0.001$ .**
