# Supplementary material for: A Voltage-Based STDP Rule Combined with Fast BCM-Like Metaplasticity Accounts for LTP and Concurrent “Heterosynaptic” LTD in the Dentate Gyrus In Vivo
Source: PLOS journal article supplement (doi:10.1371/journal.pcbi.1004588), 2015-11-06
Supplement: S4 (10.1371/journal.pcbi.1004588.s004) [file journal.pcbi.1004588.s004.PDF]

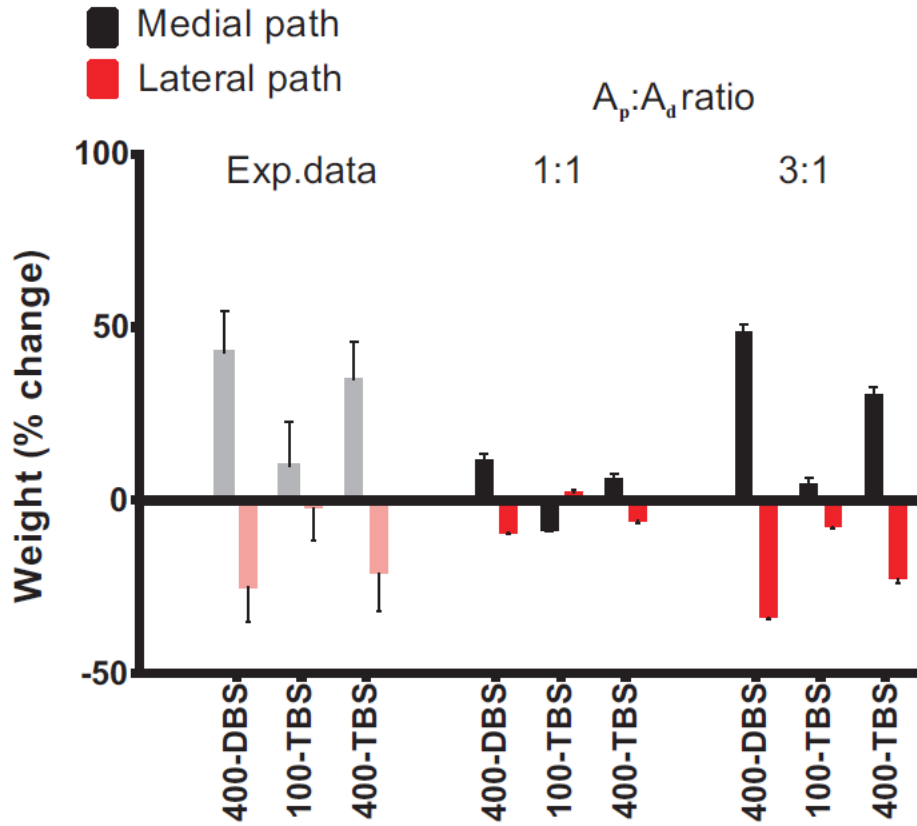

**Figure S4. Effect on the magnitude of LTP and concurrent heterosynaptic LTD when changing the ratio of initial  $A_p / A_d$  in the compartmental granule cell model.** Results for ratios 1 : 1 and 3 : 1. Other values:  $t_p = 20\text{ms}$ ,  $t_d = 70\text{ ms}$ , noise 0.05, 60% of tetanized medial synapses. Ratio 3 : 1 was used for the results in the main text.
